# Supplementary material
Source: PubMed Central journal article supplement (PMC3927475)

## Supplemental Information

### Maitin et al.; Docosaheanoic Acid Impairs the Maturation of Very Low Density Lipoproteins in Rat Hepatic Cells

#### METHODS

##### Confocal microscopy

McA cells were incubated for 4h in presence of BSA, OA (0.6 mM), or DHA (0.6 mM) +/- DFX (100 uM). Cells were fixed with PFA, permeabilized with Saponin 0.05% and immunostained with goat anti apoB (AB742; Millipore) at 1:250, and rabbit anti-LAMP1 (ab19294; Abcam) at 1:200 for 1h. The staining was revealed after incubation with anti-goat antibody conjugated with Alexa-fluor 488 and anti-rabbit antibody conjugated with Alexa-fluor 594 from Invitrogen directed against the specific species. The stained cells were mounted using Vectashield mounting medium containing DAPI and examined with a TCS-SP confocal Inverted LSM 510 laser scanning microscope (Zeiss).

##### Figure Legend

**Fig S1.** *DFX prevents apoB co-localization with lysosomes.* McA cells were incubated for 4h in presence of BSA, OA (0.6 mM), or DHA (0.6 mM +/- DFX; 100 uM). Cells were fixed, permeabilized, and immunostained for apoB (green) and LAMP1 (red). Images were acquired by confocal microscopy. Magnification: X320, with X1000 for the highlighted areas.

Figure S1

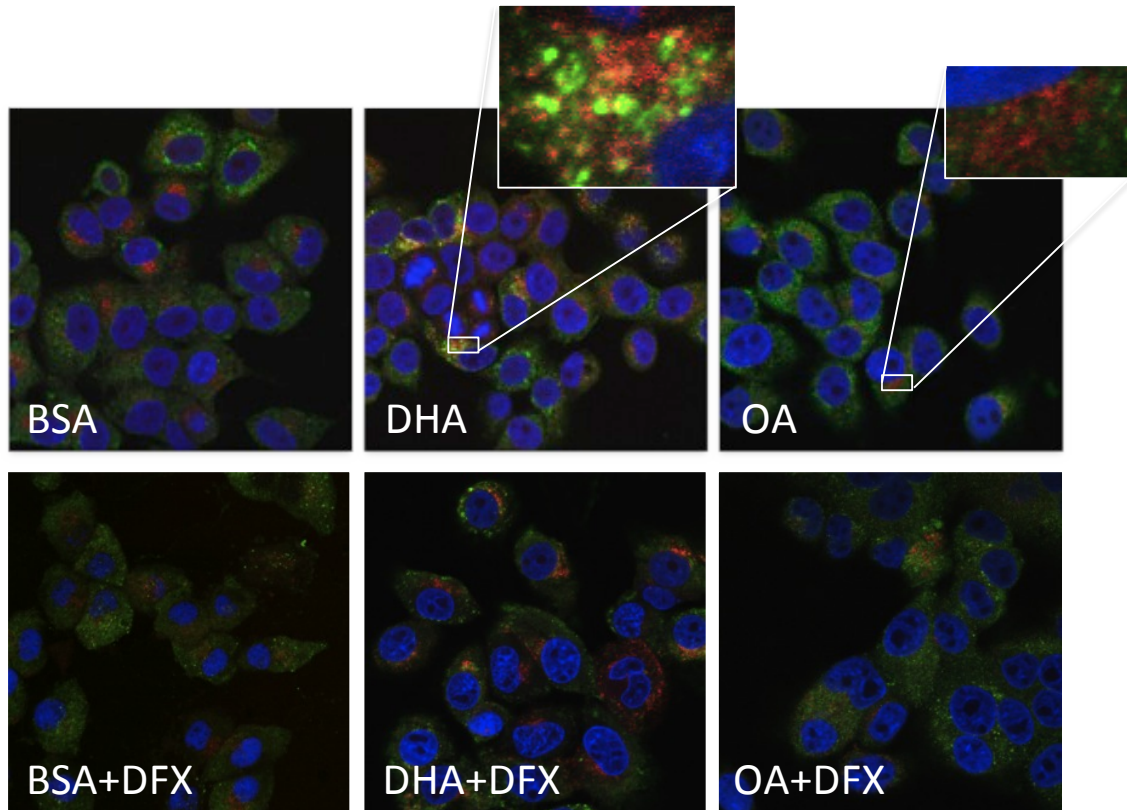

Supplement: supp_M043026_jlr.M043026-1.pdf [file supp_M043026_jlr.M043026-1.pdf]
